# Supplementary material
Source: PubMed Central journal article supplement (PMC4985021)
Supplement: NIHMS803196-supplement-Supplemental_Material.pdf [file NIHMS803196-supplement-Supplemental_Material.pdf]

## Supplemental Material

### Supplemental Table

|                                            | MESA Cohort*<br>(n=4967) | Subcohort<br>(n=322) | P Value |
|--------------------------------------------|--------------------------|----------------------|---------|
| Age, years                                 | 61.4 ± 10.1              | 61.2 ± 10.3          | 0.74    |
| Male, %                                    | 47.6                     | 48.4                 | 0.77    |
| Ethnicity, %                               |                          |                      | 0.11    |
| White                                      | 38.9                     | 36.3                 |         |
| Chinese                                    | 13.1                     | 9.6                  |         |
| Black                                      | 25.7                     | 27.6                 |         |
| Hispanic                                   | 22.3                     | 26.4                 |         |
| Systolic blood pressure, mmHg              | 125.3 ± 21.3             | 125.9 ± 21.4         | 0.62    |
| Diastolic Blood pressure, mmHg             | 71.8 ± 10.3              | 71.6 ± 10.0          | 0.61    |
| Hypertension, %                            | 42.2                     | 45.3                 | 0.28    |
| Medications for hypertension, %            | 35.1                     | 39.4                 | 0.11    |
| Pulse rate, beats/min                      | 62.9 ± 9.4               | 63.4 ± 9.4           | 0.29    |
| Body mass index, kg/m <sup>2</sup>         | 27.7 ± 4.9               | 27.7 ± 4.9           | 0.78    |
| Smoking, %                                 |                          |                      | 0.45    |
| Never                                      | 51.5                     | 49.7                 |         |
| Former                                     | 35.7                     | 35.1                 |         |
| Current                                    | 12.8                     | 15.2                 |         |
| Diabetes, %                                | 11.6                     | 12.1                 | 0.99    |
| LV ejection fraction, %                    | 69 ± 7                   | 69 ± 7               | 0.89    |
| LV mass, g                                 | 145 ± 39                 | 144 ± 37             | 0.52    |
| NT-pro BNP (pg/mL)                         | 99 ± 252                 | 105 ± 206            | 0.69    |
| Atrial fibrillation during follow-up, %    | 4.2                      | 5.6                  | 0.25    |
| Heart failure during follow-up, %          | 2.2                      | 2.5                  | 0.70    |
| Coronary heart disease during follow-up, % | 2.7                      | 4.0                  | 0.15    |

\*After excluding 37 participants with the diagnosis of atrial fibrillation at baseline.

**Video.** Feature tracking CMR was used to track LA wall motion in 2- and 4-chamber cine images.
